# Supplementary material for: Programmable half-life and anti-tumour effects of bispecific T-cell engager-albumin fusions with tuned FcRn affinity
Source: PubMed Central journal article supplement (PMC7940400; doi:10.1038/s42003-021-01790-2), 2021-03-08
Supplement: 42003_2021_1790_MOESM2_ESM.pdf [file 42003_2021_1790_MOESM2_ESM.pdf]

## Description of Additional Supplementary Files

**File name:** Supplementary Data 1

**Description:** Source data underlying graphs and charts.
